# Supplementary material for: A fluorescent and scattering dual-mode probe based on a carbon dot@cerium–guanosine monophosphate coordination polymer network for tetracycline detection
Source: Royal Society of Chemistry journal article supplement (doi:10.1039/d2ay01361d), 2022-01-01
Supplement: d2ay01361d1.pdf [file d2ay01361d1.pdf]

## **Electronic supplementary information**

# **A fluorescence and scattering dual-mode probe based on carbon dots@cerium-guanosine monophosphate coordination polymer network for tetracycline detection**

Shi Gang Liu, Shujuan Yang, Siyi Liu, Yuxiang Hu, Wenli Gao, Jiehong Deng\*, and Xingbo Shi\*

Laboratory of Micro & Nano Biosensing Technology in Food Safety, Hunan Provincial Key Laboratory of Food Science and Biotechnology, College of Food Science and Technology, Hunan Agricultural University, Changsha, 410128, China

\* Corresponding authors

E-mail address: hongjiedeng@163.com; shixingbo123@aliyun.com.

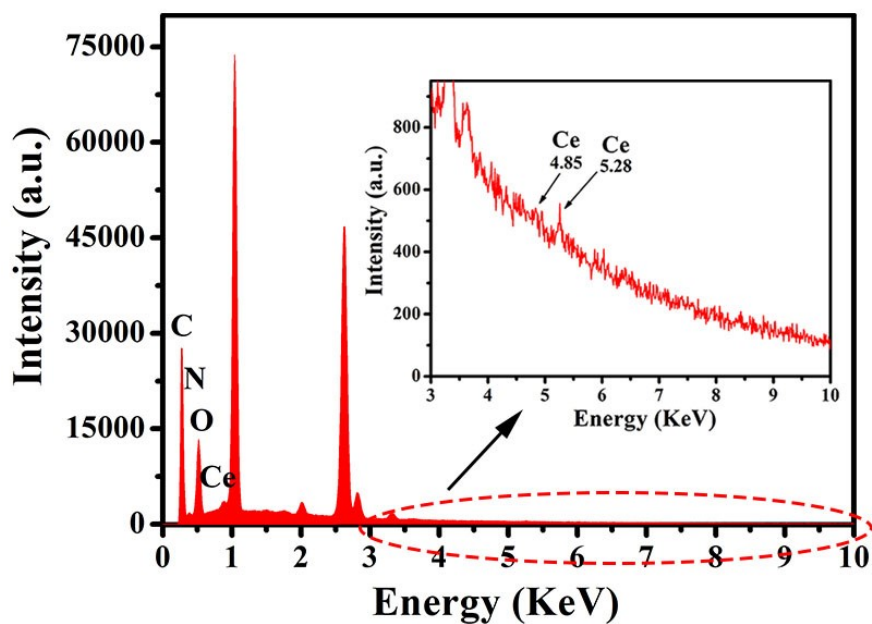

**Fig. S1** EDS spectrum of the CDs@GMP-Ce. Inset is an amplified EDS spectrum image of the energy from 3 to 10 KeV.

**Table S1** Element content of the CDs@GMP-Ce by EDS analysis.

| Element   | Weight (%)  | Atomic (%)  | Error (%)    |
|-----------|-------------|-------------|--------------|
| C         | 42.19       | 49.37       | 4.99         |
| N         | 10.65       | 10.68       | 11.39        |
| O         | 45.27       | 39.76       | 9.16         |
| <b>Ce</b> | <b>1.89</b> | <b>0.19</b> | <b>39.57</b> |

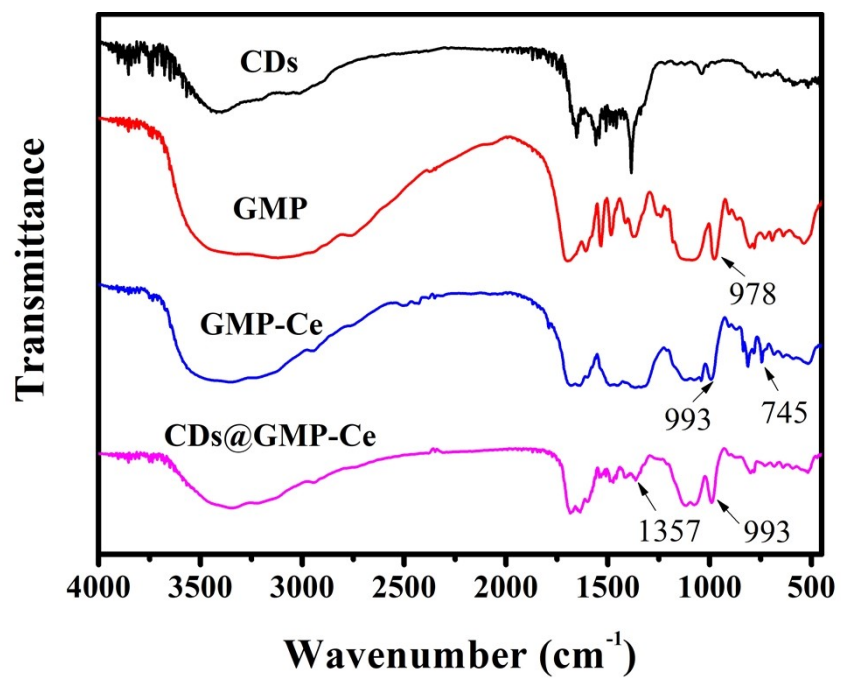

**Fig. S2** FT-IR spectra of CDs, GMP, GMP-Ce, and CDs@GMP-Ce.

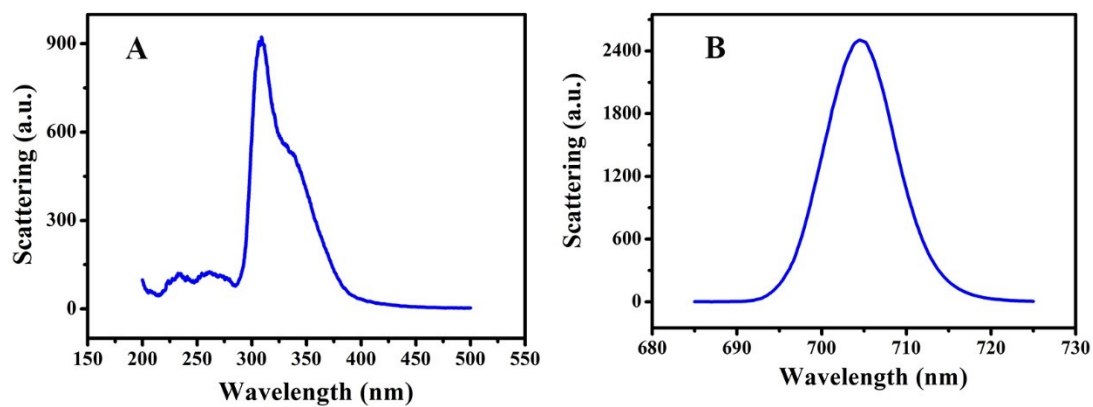

**Fig. S3** (A) Synchronous Rayleigh scattering spectrum (synchronous scanning with  $\lambda_{\text{ex}} = \lambda_{\text{em}}$ , 200-500 nm) and (B) second-order Rayleigh scattering spectrum (excitation, 350 nm) of the CDs@GMP-Ce.

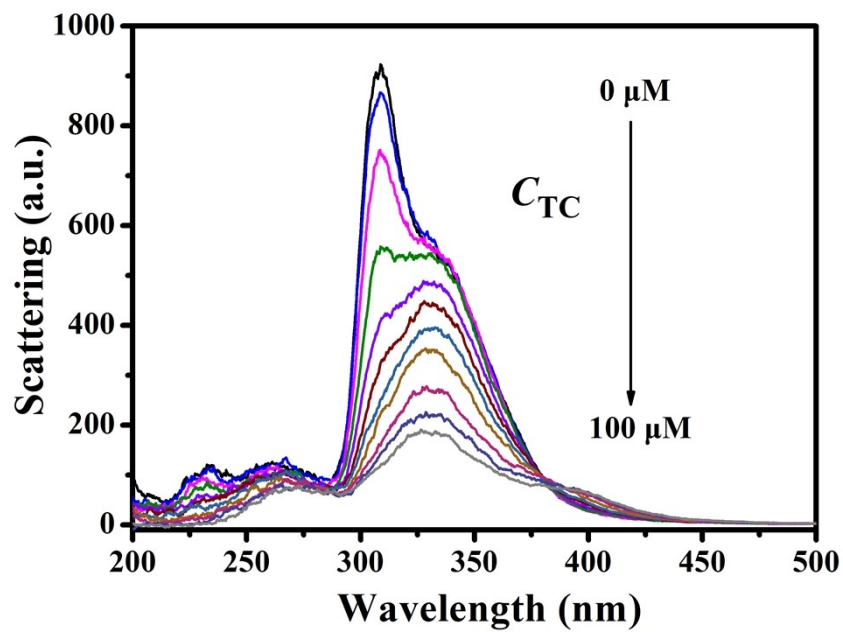

**Fig. S4** Synchronous scattering spectra of the CDs@GMP-Ce solution with the addition of different TC concentrations from 0 to 100  $\mu\text{M}$ . Condition: CDs@GMP-Ce, 84  $\text{mg mL}^{-1}$ ; PBS buffer, pH 7.2, 10 mM.

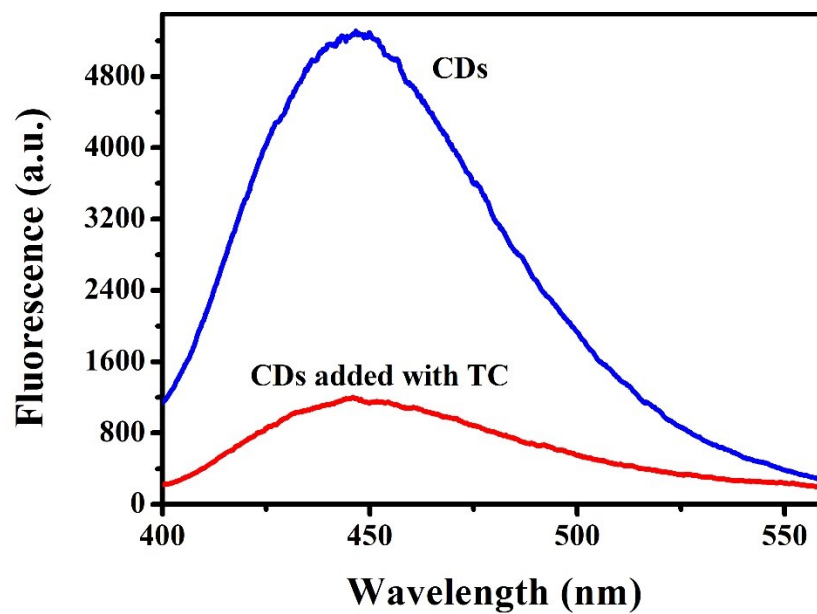

**Fig. S5** Fluorescence spectra of CDs and CDs added with TC. Condition: CDs, 0.64 mg mL<sup>-1</sup>; TC, 100 μM; PBS buffer, pH 7.2, 10 mM.

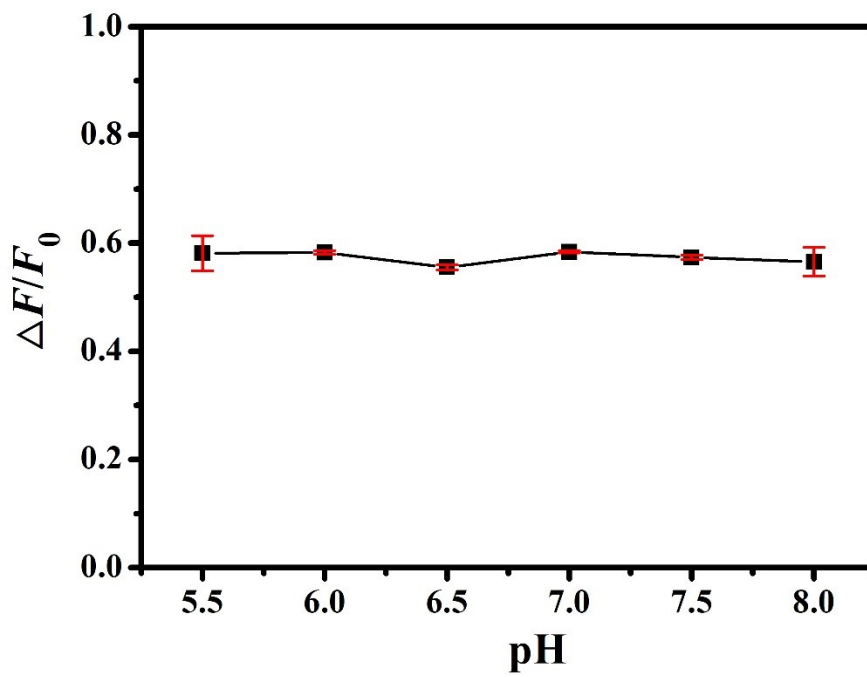

**Fig. S6** Effect of pH on TC detection. Conditions: CDs@GMP-Ce, 84 mg mL<sup>-1</sup>; PBS buffer, 10 mM; incubation time, 5 min; excitation/emission, 350/445 nm.

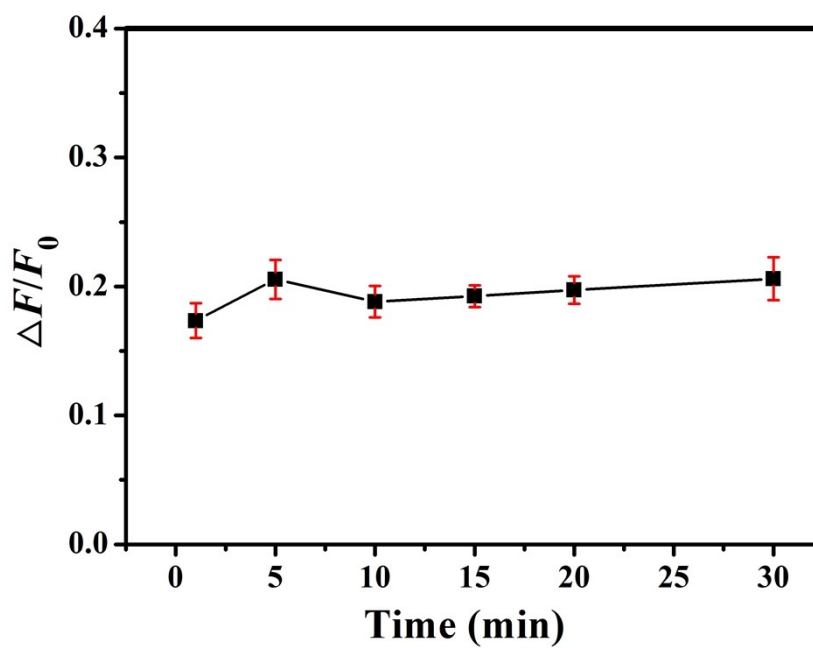

**Fig. S7** Effect of incubation time on TC detection. Conditions: CDs@GMP-Ce, 84 mg mL<sup>-1</sup>; PBS buffer, pH 7.2, 10 mM; excitation/emission, 350/445 nm.



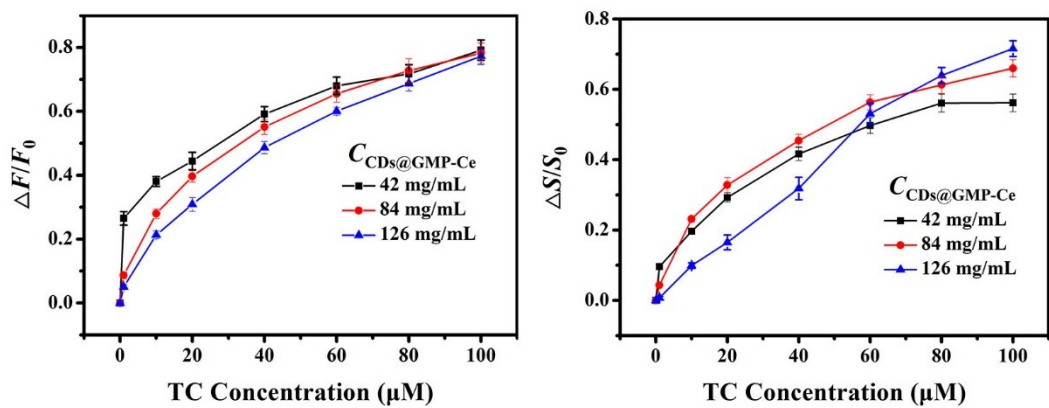

**Fig. S8** The changes of fluorescence quenching efficiency ( $\Delta F/F_0$ ) and scattering quenching efficiency ( $\Delta S/S_0$ ) under different probe (CDs@GMP-Ce) concentrations (42, 84, and 126 mg/mL).

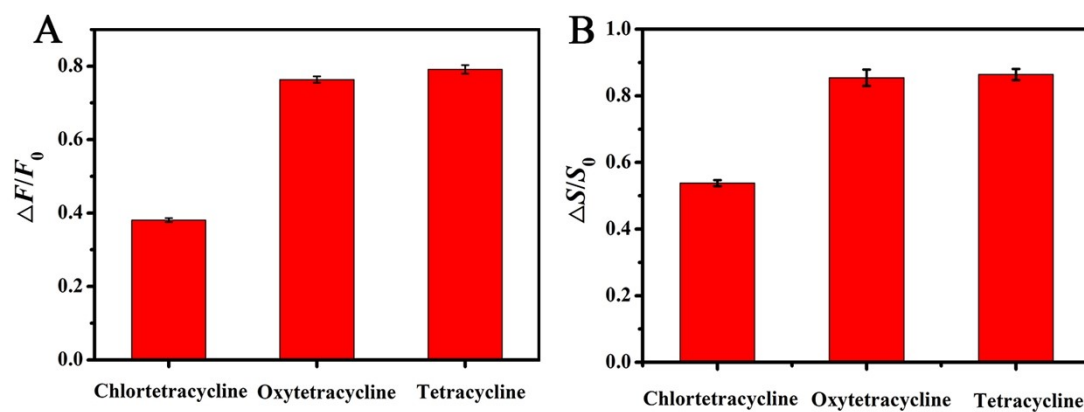

**Fig. S9** Fluorescence (A) and second-order scattering (B) responses of the sensor to chlortetracycline, oxytetracycline, and tetracycline. The concentrations of all the three antibiotics are 100  $\mu\text{M}$ . Sensing system: CDs@GMP-Ce, 84  $\text{mg mL}^{-1}$ ; PBS buffer, pH 7.2, 10 mM.

**Table S2** Comparison of some reported sensors for TC detection in analytical performance.

| Material                                     | Sensing mode               |                  | Detection of TC                             |                                   | Ref.             |
|----------------------------------------------|----------------------------|------------------|---------------------------------------------|-----------------------------------|------------------|
|                                              | Mode                       | Signal           | Linear range ( $\mu\text{M}$ )              | Detection limit ( $\mu\text{M}$ ) |                  |
| Au nanoclusters                              | Single-mode                | Colorimetry      | 1 – 16                                      | 0.046                             | S1               |
| Fe <sub>3</sub> O <sub>4</sub> nanoparticles | Single-mode                | Colorimetry      | 0.1 – 1                                     | 0.045                             | S2               |
| Carbon-doped WO <sub>3</sub>                 | Single-mode                | Electrochemistry | $0.1 \times 10^{-3}$ – $100 \times 10^{-3}$ | $4.8 \times 10^{-5}$              | S3               |
| MCS@UiO-66-NH <sub>2</sub> <sup>a</sup>      | Single-mode                | Electrochemistry | 1 – 60                                      | 0.894                             | S4               |
| BCDs-Eu/CMP-Cit <sup>b</sup>                 | Single-mode                | Fluorescence     | 0.05 – 30                                   | 0.008                             | S5               |
| Al-MOFs <sup>c</sup>                         | Single-mode                | Fluorescence     | 0 – 73                                      | 0.026                             | S6               |
| r-CDs <sup>d</sup>                           | Dual-mode, two instruments | Fluorescence     | 0 – 150                                     | 0.00173                           | S7               |
|                                              |                            | Colorimetry      | 0 – 150                                     | 0.46                              |                  |
| CNQD@AgNPs <sup>e</sup>                      | Dual-mode, two instruments | Fluorescence     | $0.1 - 10 \times 10^3$                      | 0.015                             | S8               |
|                                              |                            | Electrochemistry | 0.001 – 100                                 | 0.00026                           |                  |
| Monoxygenase                                 | Dual-mode, two instruments | Colorimetry      | 0.1 – 7                                     | 0.06                              | S9               |
|                                              |                            | Electrochemistry | 0.1 – 0.8                                   | 0.04                              |                  |
| CDs@GMP-Ce                                   | Dual-mode, one instrument  | Fluorescence     | <b>0.1 – 80</b>                             | <b>0.043</b>                      | <b>This work</b> |
|                                              |                            | Scattering       | <b>0.1 – 40</b>                             | <b>0.077</b>                      |                  |

Note: MCS@UiO-66-NH<sub>2</sub><sup>a</sup>, mesoporous carbon sphere@UiO-66-NH<sub>2</sub>; BCDs-Eu/CMP-Cit<sup>b</sup>, carbon quantum dots-cytidine monophosphate/europium coordination polymer nanoparticle; Al-MOF<sup>c</sup>, Al-based metal-organic frameworks; r-CDs<sup>d</sup>, reduced state carbon dots; CNQD@AgNPs<sup>e</sup>, carbon nitride quantum dots@silver nanoparticles.

**Table S3** Detection of TC in real samples using the proposed dual-mode probe and a commercial ELISA kit (n = 3).

| Sample                          | Method                            | Concentration                     |                         | Recovery (%) | RSD (%) |     |
|---------------------------------|-----------------------------------|-----------------------------------|-------------------------|--------------|---------|-----|
|                                 |                                   | Added ( $\mu\text{M}$ )           | Found ( $\mu\text{M}$ ) |              |         |     |
| Milk                            | Proposed method<br>(fluorescence) | 0                                 | N.D. <sup>a</sup>       | /            | /       |     |
|                                 |                                   | 10                                | 10.96                   | 109.6        | 0.1     |     |
|                                 |                                   | 20                                | 20.26                   | 101.3        | 0.1     |     |
|                                 | Proposed method<br>(scattering)   | 40                                | 36.86                   | 92.2         | 1.0     |     |
|                                 |                                   | 0                                 | N.D.                    | /            | /       |     |
|                                 |                                   | 10                                | 12.18                   | 121.8        | 1.0     |     |
|                                 | Commercial kit                    | 20                                | 23.80                   | 119.0        | 0.3     |     |
|                                 |                                   | 40                                | 35.64                   | 89.1         | 0.6     |     |
|                                 |                                   | 0                                 | N.D.                    | /            | /       |     |
|                                 | Tap water                         | Proposed method<br>(fluorescence) | 10                      | 9.26         | 92.6    | 3.2 |
|                                 |                                   |                                   | 20                      | 21.38        | 106.9   | 2.8 |
|                                 |                                   |                                   | 40                      | 42.22        | 105.6   | 2.3 |
| Proposed method<br>(scattering) |                                   | 0                                 | N.D.                    | /            | /       |     |
|                                 |                                   | 10                                | 9.58                    | 95.8         | 0.3     |     |
|                                 |                                   | 20                                | 17.42                   | 87.1         | 0.3     |     |
| Commercial kit                  |                                   | 40                                | 44.20                   | 110.5        | 0.1     |     |
|                                 |                                   | 0                                 | N.D.                    | /            | /       |     |
|                                 |                                   | 10                                | 1.15                    | 114.7        | 0.7     |     |
| Proposed method<br>(scattering) |                                   | 20                                | 18.84                   | 94.2         | 0.2     |     |
|                                 |                                   | 40                                | 37.12                   | 92.8         | 1.7     |     |
|                                 |                                   | 0                                 | N.D.                    | /            | /       |     |
| Commercial kit                  | 10                                | 10.48                             | 104.8                   | 1.2          |         |     |
|                                 | 20                                | 19.20                             | 96.0                    | 0.8          |         |     |
|                                 | 40                                | 38.96                             | 97.4                    | 1.3          |         |     |

Note: N.D.<sup>a</sup>, not detected.

## References

- S1 Z. Zhang, Y. Tian, P. Huang, F.-Y. Wu, *Talanta*, 2020, **208**, 120342.
- S2 Y. Wang, Y. Sun, H. Dai, P. Ni, S. Jiang, W. Lu, Z. Li, Z. Li, *Sens. Actuator, B*, 2016, **236**, 621-626.
- S3 J. Song, X. Lin, N. Jiang, M. Huang, *Food Chem.*, 2021, **367**, 130564.
- S4 X. Zhong, F. Wang, J. Piao, Y. Chen, *Analyst*, 2021, **146**, 2825-2833.
- S5 J. Hu, X. Yang, Q. Peng, F. Wang, Y. Zhu, X. Hu, B. Zheng, J. Du, D. Xiao, *Food Control*, 2020, **108**, 106832.
- S6 C. Li, L. Zhu, W. Yang, X. He, S. Zhao, X. Zhang, W. Tang, J. Wang, T. Yue, Z. Li, *J. Agric. Food. Chem.*, 2019, **67**, 1277-1283.
- S7 Q. Fu, C. Long, L. Qin, Z. Jiang, T. Qing, P. Zhang, B. Feng, *Environ. Pollut.*, 2021, **283**, 117109.
- S8 X. Hu, Y. Xu, X. Cui, W. Li, X. Huang, Z. Li, J. Shi, X. Zou, *Microchim. Acta*, 2020, **187**, 1-10.
- S9 M. Besharati, M. A. Tabrizi, F. Molaabasi, R. Saber, M. Shamsipur, J. Hamedi, S. Hosseinkhani, *Biotechnol. Appl. Biochem.*, 2020, **69**, 41-50.
